# Supplementary material for: Dietary Fiber Intake Influences Changes in Ankylosing Spondylitis Disease Status
Source: MDPI journal article supplement (doi:10.3390/jcm12041621), 2023-02-17
Supplement: s1 [file s1]

**Supplementary Table S2** Relationship between Dietary fiber intake and BASMI

| BASMI              | Dietary fiber intake |         |             |         |
|--------------------|----------------------|---------|-------------|---------|
|                    | Low                  |         | High        |         |
| <b>Crude Model</b> |                      | $\beta$ | 95%CI       | P-value |
| FBD symptoms (+)   | ref                  | 0.2     | (-0.5, 0.9) | 0.60    |
| FBD symptoms (-)   | ref                  | 0.2     | (-0.6, 0.9) | 0.70    |
| Total              | ref                  | 0.2     | (-0.4, 0.7) | 0.55    |
| <b>Model I</b>     |                      |         |             |         |
| FBD symptoms (+)   | ref                  | 0.5     | (-0.3, 1.4) | 0.24    |
| FBD symptoms (-)   | ref                  | 0.5     | (-0.3, 1.3) | 0.27    |
| Total              | ref                  | 0.5     | (-0.1, 1.1) | 0.08    |
| <b>Model II</b>    |                      |         |             |         |
| FBD symptoms (+)   | ref                  | 0.5     | (-0.3, 1.4) | 0.24    |
| FBD symptoms (-)   | ref                  | 0.5     | (-0.3, 1.3) | 0.27    |
| Total              | ref                  | 0.5     | (-0.1, 1.1) | 0.08    |

Model I adjusted for: sex; age; Nsaids-use; TNFi-use; BMI; lnESR; lnCRP; PsA

Model II adjusted for: sex; age Nsaids-use; TNFi-use; BMI; lnESR; lnCRP; PsA

Missing data, n (%): CRP 8 (5.2%), ESR 10 (6.5%), FBD 12 (7.3%). BASMI 10

(6.5%) BMI: body mass index; CRP: C-reactive protein; ESR: erythrocyte

sedimentation rate; BASMI: Bath Ankylosing Spondylitis Metrology Index; FBD:

functional bowel disorder; NSAID: non-steroidal anti-inflammatory drug; TNFi:

tumor necrosis factor inhibitor; PsA: psoriatic arthritis
