# Supplementary material for: Dietary Fiber Intake Influences Changes in Ankylosing Spondylitis Disease Status
Source: MDPI journal article supplement (doi:10.3390/jcm12041621), 2023-02-17
Supplement: s1 [file s1]

**Supplementary Table S3** Relationship between Dietary fiber intake and BASFI

| <b>BASFI</b>       | Dietary fiber intake |         |              |         |
|--------------------|----------------------|---------|--------------|---------|
|                    | Low                  |         | High         |         |
| <b>Crude Model</b> |                      | $\beta$ | 95%CI        | P-value |
| FBD symptoms (+)   | ref                  | -1.0    | (-1.7, -0.3) | < 0.01  |
| FBD symptoms (-)   | ref                  | -0.5    | (-1.0, 0.0)  | 0.08    |
| Total              | ref                  | -0.7    | (-1.1, -0.3) | < 0.01  |
| <b>Model I</b>     |                      |         |              |         |
| FBD symptoms (+)   | ref                  | -0.5    | (-1.2, 0.3)  | 0.24    |
| FBD symptoms (-)   | ref                  | -0.4    | (-1.0, 0.2)  | 0.16    |
| Total              | ref                  | -0.4    | (-0.9, 0.0)  | 0.07    |
| <b>Model II</b>    |                      |         |              |         |
| FBD symptoms (+)   | ref                  | -1.0    | (-1.7, -0.3) | < 0.01  |
| FBD symptoms (-)   | ref                  | -0.2    | (-0.7, 0.4)  | 0.56    |
| Total              | ref                  | -0.4    | (-0.9, 0.1)  | 0.10    |

Model I adjusted for: sex; age; lnESR; lnCRP

Model II adjusted for: sex; age; CM -use; TNFi-use; BMI; lnESR; lnCRP

Missing data, n (%): ASDAS-CRP 8 (5.2%), CRP 8 (5.2%), ESR 10 (6.5%), FBD 12 (7.3%). BMI: body mass index; CRP: C-reactive protein; ESR: erythrocyte sedimentation rate; BASFI: Bath Ankylosing Spondylitis Functional Index; FBD: functional bowel disorder; TNFi: tumor necrosis factor inhibitor; CM: Chinese medicine
