# Supplementary material for: Dietary Fiber Intake Influences Changes in Ankylosing Spondylitis Disease Status
Source: MDPI journal article supplement (doi:10.3390/jcm12041621), 2023-02-17
Supplement: s1 [file s1]

**SupplementaryTable S1:** Univariable associations between dietary fiber and assessments of

|           |     | Univariate analysis |                    |         |
|-----------|-----|---------------------|--------------------|---------|
|           |     | Low n=93 (56.36%)   | High n=72 (43.64%) |         |
|           |     | $\beta$             | 95%CI              | P-value |
| ESR       | ref | -10.9               | (-16.6, -5.1)      | < 0.01  |
| CRP       | ref | -8.8                | (-12.4, -5.2)      | < 0.01  |
| ASDAS-CRP | ref | -1.0                | (-1.2, -0.7)       | < 0.01  |
| BASDAI    | ref | -1.0                | (-1.2, -0.7)       | < 0.01  |
| ASAS-HI   | ref | -1.8                | (-2.8, -0.7)       | < 0.01  |
| BASMI     | ref | 0.1                 | (-0.4, 0.6)        | 0.73    |
| BASFI     | ref | -0.8                | (-1.1, -0.4)       | < 0.01  |

AS

Missing data, n (%): CRP 8 (5.2%), ESR 10 (6.5%), ASDAS-CRP 8 (5.2%), BASMI 10 (6.5%). BMI: body mass index; HLA-B27: human leucocyte antigen B-27; CRP: C-reactive protein; ESR: erythrocyte sedimentation rate; ASDAS-CRP: Ankylosing Spondylitis Disease Activity Score based on CRP; BASDAI: Bath Ankylosing Spondylitis Disease Activity Index; ASAS HI: Assessment of Spondyloarthritis International Society Health Index; BASFI: Bath Ankylosing Spondylitis Functional Index; BASMI: Bath Ankylosing Spondylitis Metrology Index
