# Supplementary material for: Dietary Fiber Intake Influences Changes in Ankylosing Spondylitis Disease Status
Source: MDPI journal article supplement (doi:10.3390/jcm12041621), 2023-02-17
Supplement: s1 [file s1]

**Supplementary Table S4** Relationship between Dietary fiber intake and ASAS-HI

| ASAS-HI            | Dietary fiber intake |         |              |         |
|--------------------|----------------------|---------|--------------|---------|
|                    | Low                  |         | High         |         |
| <b>Crude Model</b> |                      | $\beta$ | 95%CI        | P-value |
| FBD symptoms (+)   | ref                  | -2.6    | (-4.2, -1.0) | <0.01   |
| FBD symptoms (-)   | ref                  | -0.7    | (-2.0, 0.7)  | 0.31    |
| Total              | ref                  | -1.4    | (-2.5, -0.4) | <0.01   |
| <b>Model I</b>     |                      |         |              |         |
| FBD symptoms (+)   | ref                  | -1.9    | (-3.6, -0.2) | 0.03    |
| FBD symptoms (-)   | ref                  | -1.0    | (-2.6, 0.6)  | 0.23    |
| Total              | ref                  | -1.4    | (-2.6, -0.2) | 0.02    |
| <b>Model II</b>    |                      |         |              |         |
| FBD symptoms (+)   | ref                  | -2.1    | (-4.0, -0.1) | 0.04    |
| FBD symptoms (-)   | ref                  | -0.6    | (-2.1, 0.9)  | 0.44    |
| Total              | ref                  | -1.2    | (-2.4, 0.0)  | 0.05    |

Model I adjusted for: sex; age; lnCRP; BMI

Model II adjusted for: sex; age; CM-use; NSAID-use; BMI; lnESR; lnCRP

Missing data, n (%): CRP 8 (5.2%), ESR 10 (6.5%), FBD 12 (7.3%). BMI: body mass index; CRP: C-reactive protein; ESR: erythrocyte sedimentation rate; ASAS HI: Assessment of Spondyloarthritis International Society Health Index; FBD: functional bowel disorder; NSAID: nonsteroidal anti-inflammatory drug; CM: Chinese medicine
