# Supplementary material for: Dietary Fiber Intake Influences Changes in Ankylosing Spondylitis Disease Status
Source: MDPI journal article supplement (doi:10.3390/jcm12041621), 2023-02-17
Supplement: s1 [file s1]

Semi-quantitative Food Frequency Questionnaire (AS-FMT)

1. Name [fill in the blank] \*

2. gender [Single-choice] \*

- ☐Men
- ☐Girl

3. How often do you eat the following rice and pasta? How many grams do you eat each time? (Please estimate based on the picture prompt and answer in grams in the option description.) [Matrix Single Choice] \*

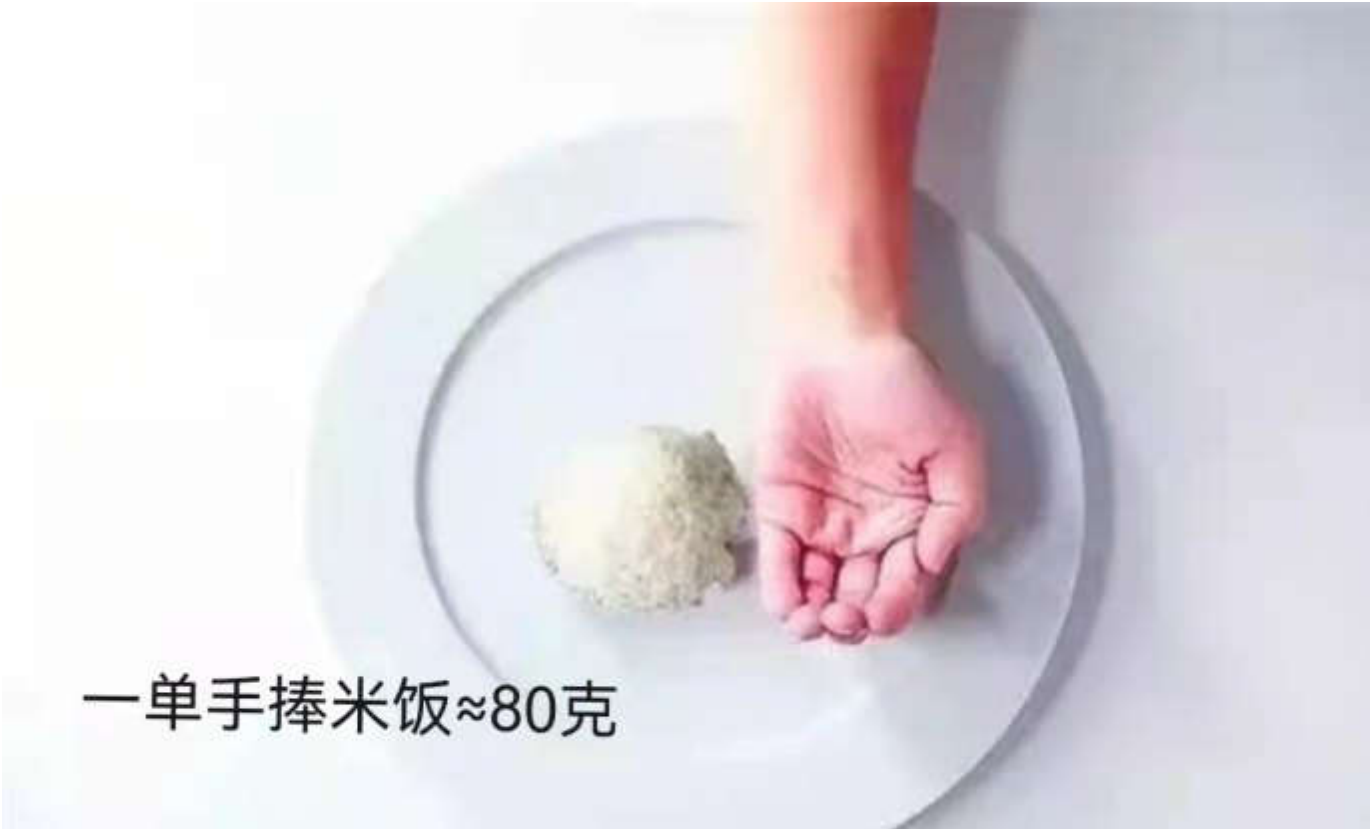

|  |       |        |     |        |   |     |     |        |    |
|--|-------|--------|-----|--------|---|-----|-----|--------|----|
|  | Basic | 1 time | 2-3 | 1 time | 2 | 3-4 | 5-6 | 1 time | ≥2 |
|--|-------|--------|-----|--------|---|-----|-----|--------|----|

|                                                     | ally<br>don't<br>eat  | per<br>month          | times<br>per<br>month | per<br>week           | times<br>a<br>week    | times<br>per<br>week  | times<br>per<br>week  | per<br>day            | times<br>per<br>day   |
|-----------------------------------------------------|-----------------------|-----------------------|-----------------------|-----------------------|-----------------------|-----------------------|-----------------------|-----------------------|-----------------------|
| Rice                                                | <input type="radio"/> |
| Congee                                              | <input type="radio"/> |
| Noodles                                             | <input type="radio"/> |
| Dumplings<br>/ Buns                                 | <input type="radio"/> |
| Steamed<br>buns/flowe<br>r<br>rolls/cooke<br>d buns | <input type="radio"/> |
| Bread                                               | <input type="radio"/> |

4. How often do you eat the following potatoes? How many grams do you eat each time?  
(Please estimate based on the picture prompt and answer in grams in the option  
description.) [Matrix Single Choice] \*

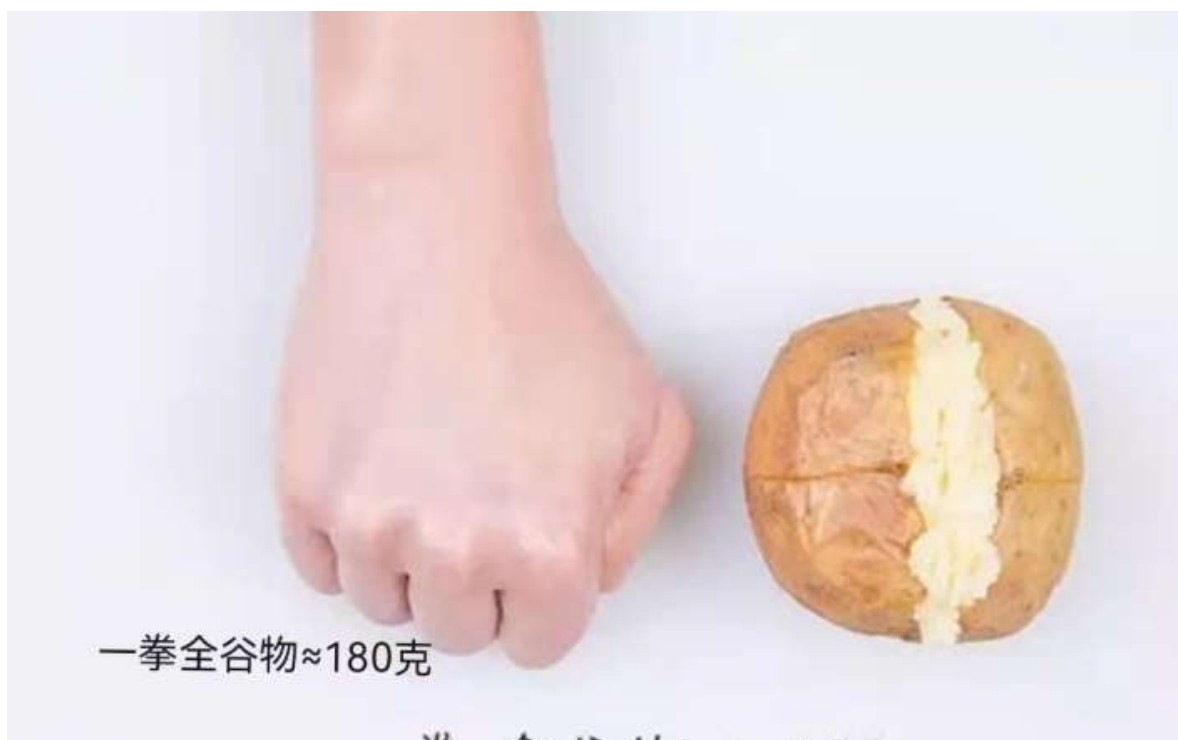

|                 | Basic<br>ally<br>don't<br>eat | 1 time<br>per<br>month | 2-3<br>times<br>per<br>month | 1 time<br>per<br>week | 2<br>times<br>a<br>week | 3-4<br>times<br>per<br>week | 5-6<br>times<br>per<br>week | 1 time<br>per<br>day  | ≥2<br>times<br>per<br>day |
|-----------------|-------------------------------|------------------------|------------------------------|-----------------------|-------------------------|-----------------------------|-----------------------------|-----------------------|---------------------------|
| Potatoes        | <input type="radio"/>         | <input type="radio"/>  | <input type="radio"/>        | <input type="radio"/> | <input type="radio"/>   | <input type="radio"/>       | <input type="radio"/>       | <input type="radio"/> | <input type="radio"/>     |
| Sweet<br>Potato | <input type="radio"/>         | <input type="radio"/>  | <input type="radio"/>        | <input type="radio"/> | <input type="radio"/>   | <input type="radio"/>       | <input type="radio"/>       | <input type="radio"/> | <input type="radio"/>     |
| Taro            | <input type="radio"/>         | <input type="radio"/>  | <input type="radio"/>        | <input type="radio"/> | <input type="radio"/>   | <input type="radio"/>       | <input type="radio"/>       | <input type="radio"/> | <input type="radio"/>     |

5. How often do you eat the following mixed/coarse grains? How many grams do you eat each time? (Please estimate based on the picture prompt and answer in grams in the option description.) [Matrix Single Choice] \*

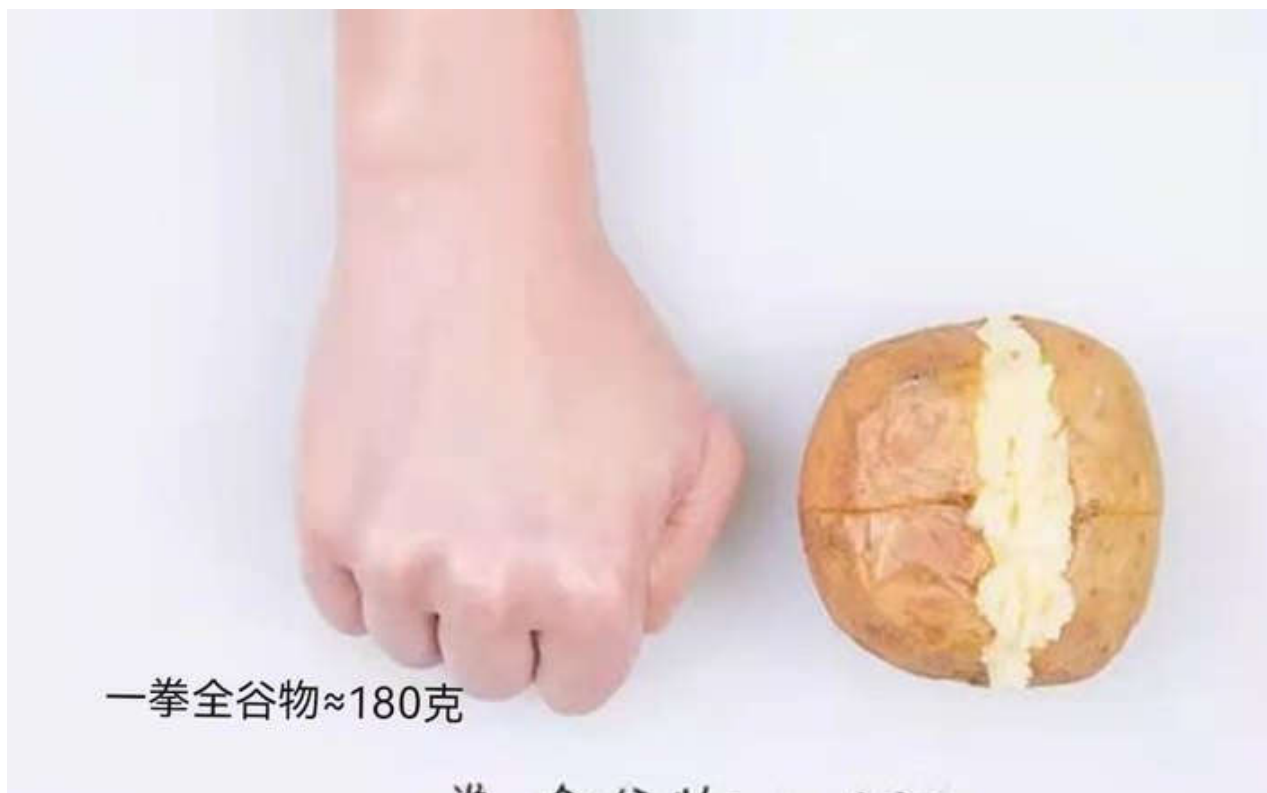

|         | Basic<br>ally<br>don't<br>eat | 1 time<br>per<br>month | 2-3<br>times<br>per<br>month | 1 time<br>per<br>week | 2<br>times<br>a<br>week | 3-4<br>times<br>per<br>week | 5-6<br>times<br>per<br>week | 1 time<br>per<br>day  | ≥2<br>times<br>per<br>day |
|---------|-------------------------------|------------------------|------------------------------|-----------------------|-------------------------|-----------------------------|-----------------------------|-----------------------|---------------------------|
| Xiaomi  | <input type="radio"/>         | <input type="radio"/>  | <input type="radio"/>        | <input type="radio"/> | <input type="radio"/>   | <input type="radio"/>       | <input type="radio"/>       | <input type="radio"/> | <input type="radio"/>     |
| Oatmeal | <input type="radio"/>         | <input type="radio"/>  | <input type="radio"/>        | <input type="radio"/> | <input type="radio"/>   | <input type="radio"/>       | <input type="radio"/>       | <input type="radio"/> | <input type="radio"/>     |
| Corn    | <input type="radio"/>         | <input type="radio"/>  | <input type="radio"/>        | <input type="radio"/> | <input type="radio"/>   | <input type="radio"/>       | <input type="radio"/>       | <input type="radio"/> | <input type="radio"/>     |

6. How often do you eat the following mixed legumes? How many grams do you eat each time? (Please estimate based on the picture prompt and answer in grams in the option description.) [Matrix Single Choice] \*

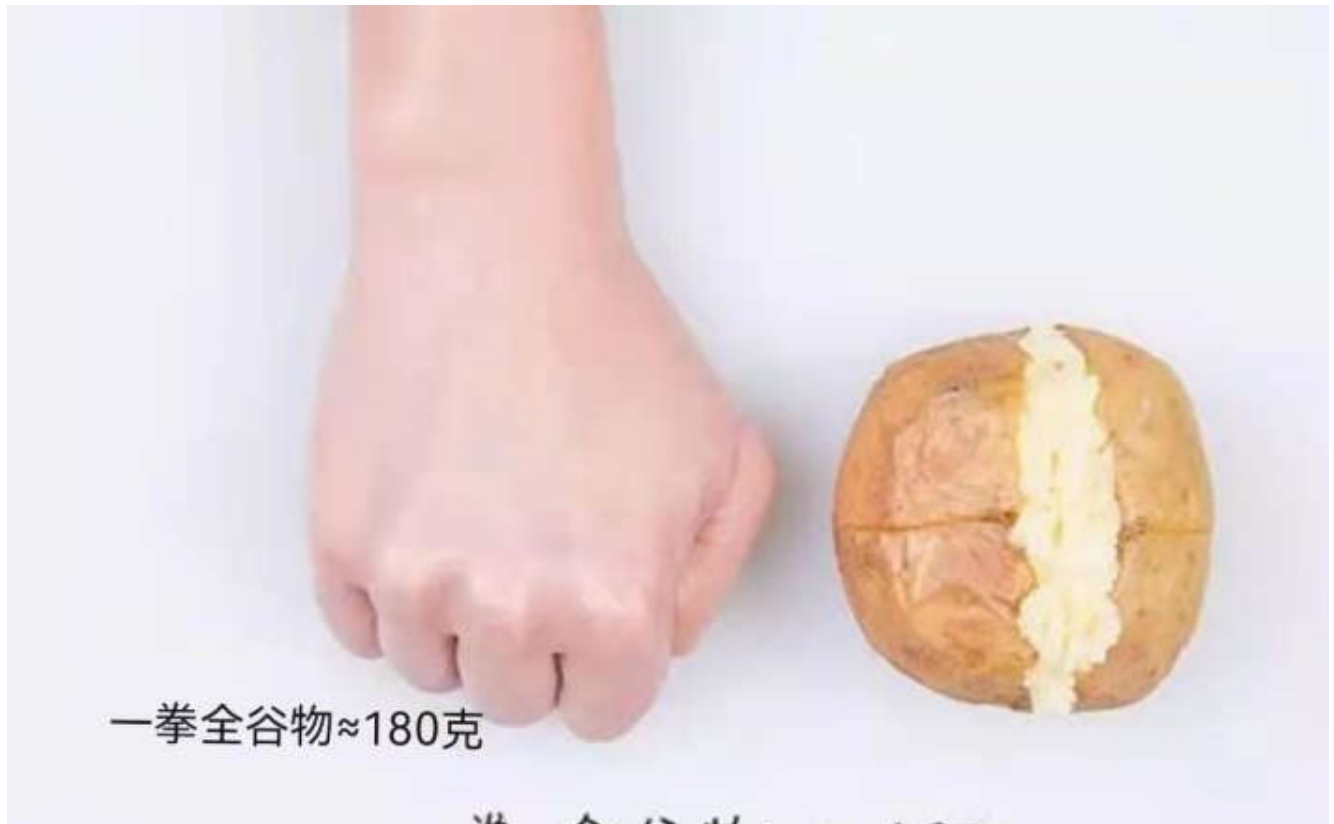

|                 | Basic<br>ally<br>don't<br>eat | 1 time<br>per<br>month | 2-3<br>times<br>per<br>month | 1 time<br>per<br>week | 2<br>times<br>a<br>week | 3-4<br>times<br>per<br>week | 5-6<br>times<br>per<br>week | 1 time<br>per<br>day  | ≥2<br>times<br>per<br>day |
|-----------------|-------------------------------|------------------------|------------------------------|-----------------------|-------------------------|-----------------------------|-----------------------------|-----------------------|---------------------------|
| Kidney<br>beans | <input type="radio"/>         | <input type="radio"/>  | <input type="radio"/>        | <input type="radio"/> | <input type="radio"/>   | <input type="radio"/>       | <input type="radio"/>       | <input type="radio"/> | <input type="radio"/>     |
| Chickpeas       | <input type="radio"/>         | <input type="radio"/>  | <input type="radio"/>        | <input type="radio"/> | <input type="radio"/>   | <input type="radio"/>       | <input type="radio"/>       | <input type="radio"/> | <input type="radio"/>     |
| Mung<br>beans   | <input type="radio"/>         | <input type="radio"/>  | <input type="radio"/>        | <input type="radio"/> | <input type="radio"/>   | <input type="radio"/>       | <input type="radio"/>       | <input type="radio"/> | <input type="radio"/>     |
| Fava<br>beans   | <input type="radio"/>         | <input type="radio"/>  | <input type="radio"/>        | <input type="radio"/> | <input type="radio"/>   | <input type="radio"/>       | <input type="radio"/>       | <input type="radio"/> | <input type="radio"/>     |

7. How often do you eat the following tofu and its products? How many grams do you eat each time? (Please estimate based on the picture prompt and answer in the option description in grams.) [Matrix Single-Choice Question] \*

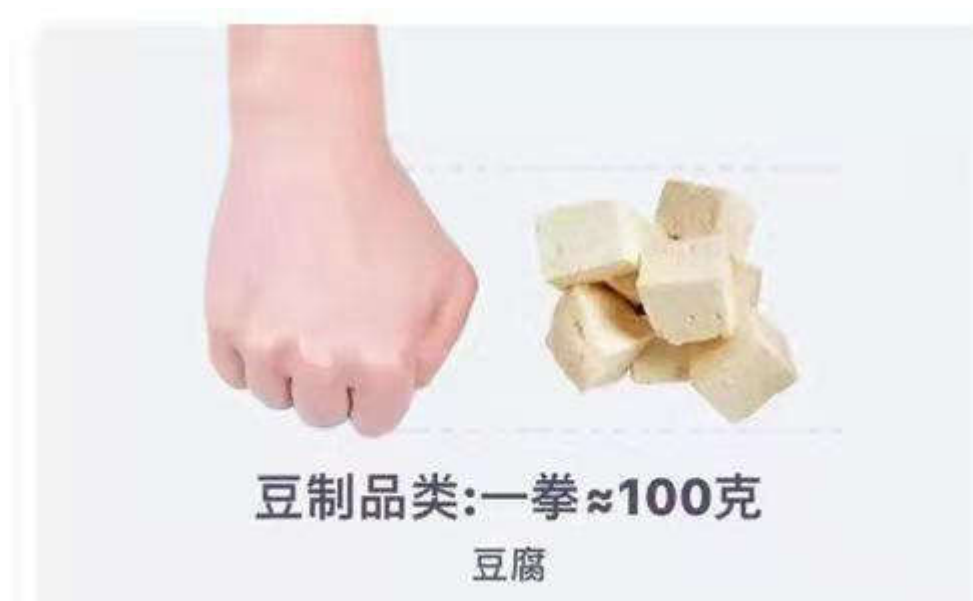

|                         | Basic<br>ally<br>don't<br>eat | 1 time<br>per<br>month | 2-3<br>times<br>per<br>month | 1 time<br>per<br>week | 2<br>times<br>a<br>week | 3-4<br>times<br>per<br>week | 5-6<br>times<br>per<br>week | 1 time<br>per<br>day  | ≥2<br>times<br>per<br>day |
|-------------------------|-------------------------------|------------------------|------------------------------|-----------------------|-------------------------|-----------------------------|-----------------------------|-----------------------|---------------------------|
| Tofu                    | <input type="radio"/>         | <input type="radio"/>  | <input type="radio"/>        | <input type="radio"/> | <input type="radio"/>   | <input type="radio"/>       | <input type="radio"/>       | <input type="radio"/> | <input type="radio"/>     |
| Dried bean<br>curd/skin | <input type="radio"/>         | <input type="radio"/>  | <input type="radio"/>        | <input type="radio"/> | <input type="radio"/>   | <input type="radio"/>       | <input type="radio"/>       | <input type="radio"/> | <input type="radio"/>     |
| Roti                    | <input type="radio"/>         | <input type="radio"/>  | <input type="radio"/>        | <input type="radio"/> | <input type="radio"/>   | <input type="radio"/>       | <input type="radio"/>       | <input type="radio"/> | <input type="radio"/>     |
| Soy milk                | <input type="radio"/>         | <input type="radio"/>  | <input type="radio"/>        | <input type="radio"/> | <input type="radio"/>   | <input type="radio"/>       | <input type="radio"/>       | <input type="radio"/> | <input type="radio"/>     |

8. How often do you eat the following fresh bean vegetables? How many grams do you eat each time? (Please estimate based on the picture prompt and answer in grams in the option description.) [Matrix Single Choice] \*

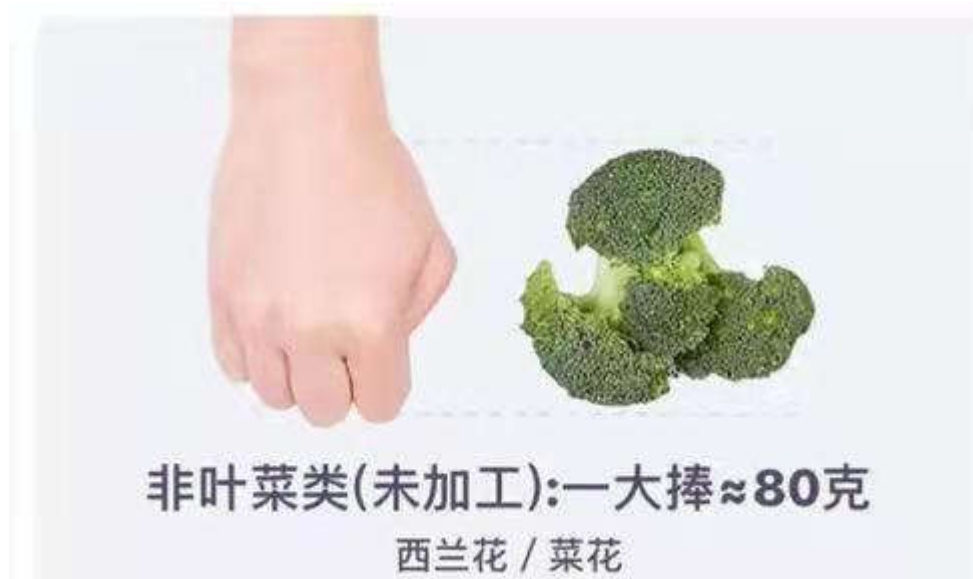

|                          | Basic<br>ally<br>don't<br>eat | 1 time<br>per<br>month | 2-3<br>times<br>per<br>month | 1 time<br>per<br>week | 2<br>times<br>a<br>week | 3-4<br>times<br>per<br>week | 5-6<br>times<br>per<br>week | 1 time<br>per<br>day  | ≥2<br>times<br>per<br>day |
|--------------------------|-------------------------------|------------------------|------------------------------|-----------------------|-------------------------|-----------------------------|-----------------------------|-----------------------|---------------------------|
| Peas                     | <input type="radio"/>         | <input type="radio"/>  | <input type="radio"/>        | <input type="radio"/> | <input type="radio"/>   | <input type="radio"/>       | <input type="radio"/>       | <input type="radio"/> | <input type="radio"/>     |
| Cowpea<br>(bean<br>curd) | <input type="radio"/>         | <input type="radio"/>  | <input type="radio"/>        | <input type="radio"/> | <input type="radio"/>   | <input type="radio"/>       | <input type="radio"/>       | <input type="radio"/> | <input type="radio"/>     |
| Lentils                  | <input type="radio"/>         | <input type="radio"/>  | <input type="radio"/>        | <input type="radio"/> | <input type="radio"/>   | <input type="radio"/>       | <input type="radio"/>       | <input type="radio"/> | <input type="radio"/>     |
| Quadrangu<br>lar beans   | <input type="radio"/>         | <input type="radio"/>  | <input type="radio"/>        | <input type="radio"/> | <input type="radio"/>   | <input type="radio"/>       | <input type="radio"/>       | <input type="radio"/> | <input type="radio"/>     |
| Dutch<br>beans           | <input type="radio"/>         | <input type="radio"/>  | <input type="radio"/>        | <input type="radio"/> | <input type="radio"/>   | <input type="radio"/>       | <input type="radio"/>       | <input type="radio"/> | <input type="radio"/>     |
| bean<br>seedling         | <input type="radio"/>         | <input type="radio"/>  | <input type="radio"/>        | <input type="radio"/> | <input type="radio"/>   | <input type="radio"/>       | <input type="radio"/>       | <input type="radio"/> | <input type="radio"/>     |

9. How often do you eat the following green leafy vegetables? How many grams do you eat each time? (Please estimate based on the picture prompt and answer in grams in the option description.) [Matrix Single Choice] \*





|                             |                       |                       |                       |                       |                       |                       |                       |                       |                       |
|-----------------------------|-----------------------|-----------------------|-----------------------|-----------------------|-----------------------|-----------------------|-----------------------|-----------------------|-----------------------|
| (Chinese<br>cabbage)        |                       |                       |                       |                       |                       |                       |                       |                       |                       |
| Chrysanthemum<br>coronarium | <input type="radio"/> |
| Cilantro                    | <input type="radio"/> |
| Celery                      | <input type="radio"/> |
| Kale<br>(Round<br>cabbage)  | <input type="radio"/> |

10. How often do you eat the following squash vegetables? How many grams do you eat each time? (Please estimate based on the picture prompt and answer in grams in the option description.) [Matrix Single Choice] \*

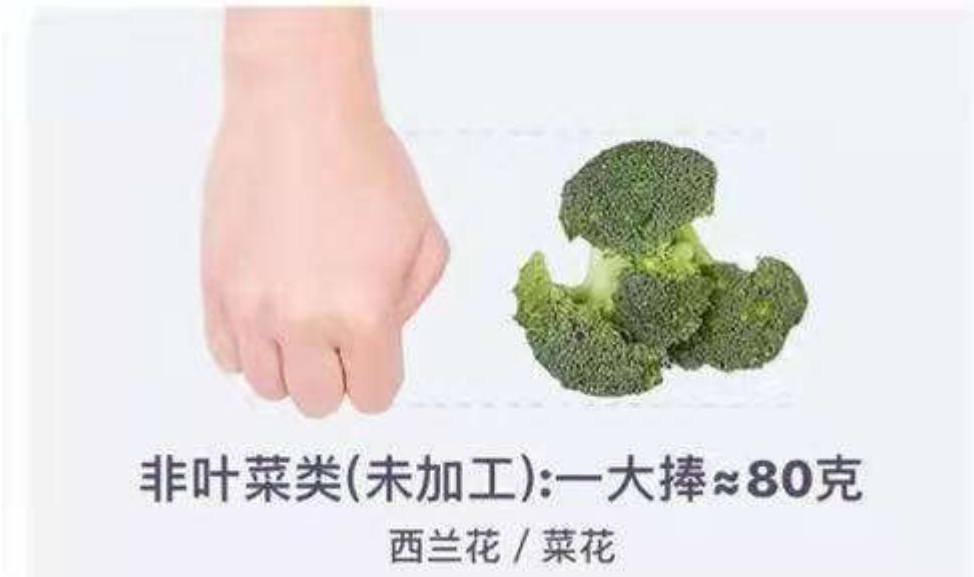

|  |                               |                        |                              |                       |                         |                             |                             |                      |                           |
|--|-------------------------------|------------------------|------------------------------|-----------------------|-------------------------|-----------------------------|-----------------------------|----------------------|---------------------------|
|  | Basic<br>ally<br>don't<br>eat | 1 time<br>per<br>month | 2-3<br>times<br>per<br>month | 1 time<br>per<br>week | 2<br>times<br>a<br>week | 3-4<br>times<br>per<br>week | 5-6<br>times<br>per<br>week | 1 time<br>per<br>day | ≥2<br>times<br>per<br>day |
|--|-------------------------------|------------------------|------------------------------|-----------------------|-------------------------|-----------------------------|-----------------------------|----------------------|---------------------------|



12. How often do you eat the following onion and garlic vegetables? How many grams do you eat each time? (Please estimate based on the picture prompt and answer in grams in the option description.) [Matrix Single Choice] \*

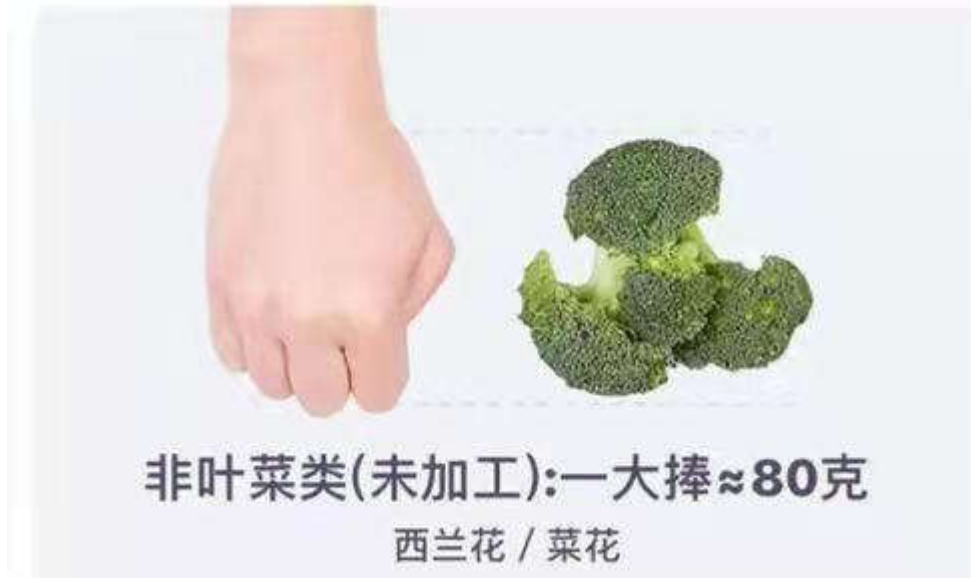

|                   | Basic<br>ally<br>don't<br>eat | 1 time<br>per<br>month | 2-3<br>times<br>per<br>month | 1 time<br>per<br>week | 2<br>times<br>a<br>week | 3-4<br>times<br>per<br>week | 5-6<br>times<br>per<br>week | 1 time<br>per<br>day  | ≥2<br>times<br>per<br>day |
|-------------------|-------------------------------|------------------------|------------------------------|-----------------------|-------------------------|-----------------------------|-----------------------------|-----------------------|---------------------------|
| Onion             | <input type="radio"/>         | <input type="radio"/>  | <input type="radio"/>        | <input type="radio"/> | <input type="radio"/>   | <input type="radio"/>       | <input type="radio"/>       | <input type="radio"/> | <input type="radio"/>     |
| Garlic<br>sprouts | <input type="radio"/>         | <input type="radio"/>  | <input type="radio"/>        | <input type="radio"/> | <input type="radio"/>   | <input type="radio"/>       | <input type="radio"/>       | <input type="radio"/> | <input type="radio"/>     |
| Onion             | <input type="radio"/>         | <input type="radio"/>  | <input type="radio"/>        | <input type="radio"/> | <input type="radio"/>   | <input type="radio"/>       | <input type="radio"/>       | <input type="radio"/> | <input type="radio"/>     |
| Chives            | <input type="radio"/>         | <input type="radio"/>  | <input type="radio"/>        | <input type="radio"/> | <input type="radio"/>   | <input type="radio"/>       | <input type="radio"/>       | <input type="radio"/> | <input type="radio"/>     |

13. How often do you eat the following other vegetables? How many grams do you eat each time? (Please estimate based on the picture prompt and answer in grams in the option description.) [Matrix Single Choice] \*



|          |                       |                       |                       |                       |                       |                       |                       |                       |                       |
|----------|-----------------------|-----------------------|-----------------------|-----------------------|-----------------------|-----------------------|-----------------------|-----------------------|-----------------------|
| Eggplant | <input type="radio"/> |
| Yam      | <input type="radio"/> |
| root     | <input type="radio"/> |

14. How often do you eat the following mushrooms and algae? How many grams do you eat each time? (Please estimate based on the picture prompt and answer in grams in the option description.) [Matrix single-choice] \*

|                      | Basic<br>ally<br>don't<br>eat | 1 time<br>per<br>month | 2-3<br>times<br>per<br>month | 1 time<br>per<br>week | 2<br>times<br>a<br>week | 3-4<br>times<br>per<br>week | 5-6<br>times<br>per<br>week | 1 time<br>per<br>day  | ≥2<br>times<br>per<br>day |
|----------------------|-------------------------------|------------------------|------------------------------|-----------------------|-------------------------|-----------------------------|-----------------------------|-----------------------|---------------------------|
| Mushroom             | <input type="radio"/>         | <input type="radio"/>  | <input type="radio"/>        | <input type="radio"/> | <input type="radio"/>   | <input type="radio"/>       | <input type="radio"/>       | <input type="radio"/> | <input type="radio"/>     |
| Shiitake<br>Mushroom | <input type="radio"/>         | <input type="radio"/>  | <input type="radio"/>        | <input type="radio"/> | <input type="radio"/>   | <input type="radio"/>       | <input type="radio"/>       | <input type="radio"/> | <input type="radio"/>     |
| Tea Tree<br>Mushroom | <input type="radio"/>         | <input type="radio"/>  | <input type="radio"/>        | <input type="radio"/> | <input type="radio"/>   | <input type="radio"/>       | <input type="radio"/>       | <input type="radio"/> | <input type="radio"/>     |
| Apricot<br>mushroom  | <input type="radio"/>         | <input type="radio"/>  | <input type="radio"/>        | <input type="radio"/> | <input type="radio"/>   | <input type="radio"/>       | <input type="radio"/>       | <input type="radio"/> | <input type="radio"/>     |
| Black<br>fungus      | <input type="radio"/>         | <input type="radio"/>  | <input type="radio"/>        | <input type="radio"/> | <input type="radio"/>   | <input type="radio"/>       | <input type="radio"/>       | <input type="radio"/> | <input type="radio"/>     |
| Skunk<br>cabbage     | <input type="radio"/>         | <input type="radio"/>  | <input type="radio"/>        | <input type="radio"/> | <input type="radio"/>   | <input type="radio"/>       | <input type="radio"/>       | <input type="radio"/> | <input type="radio"/>     |
| Nori                 | <input type="radio"/>         | <input type="radio"/>  | <input type="radio"/>        | <input type="radio"/> | <input type="radio"/>   | <input type="radio"/>       | <input type="radio"/>       | <input type="radio"/> | <input type="radio"/>     |
| Kelp                 | <input type="radio"/>         | <input type="radio"/>  | <input type="radio"/>        | <input type="radio"/> | <input type="radio"/>   | <input type="radio"/>       | <input type="radio"/>       | <input type="radio"/> | <input type="radio"/>     |

15. How often do you eat the following fruits? How many grams do you eat each time? (Please estimate based on the picture prompt and answer in grams in the option description.) [Matrix Single Choice] \*



|               |                       |                       |                       |                       |                       |                       |                       |                       |                       |
|---------------|-----------------------|-----------------------|-----------------------|-----------------------|-----------------------|-----------------------|-----------------------|-----------------------|-----------------------|
| Pineapple     | <input type="radio"/> |
| Mangosteen    | <input type="radio"/> |
| Dragon Fruit  | <input type="radio"/> |
| Dates (dried) | <input type="radio"/> |
| Dates (fresh) | <input type="radio"/> |
| Peach         | <input type="radio"/> |
| Apricot       | <input type="radio"/> |
| Pears         | <input type="radio"/> |

16. How often do you eat the following nuts? How many grams do you eat each time?  
(Please estimate based on the picture prompt, grams are answered in the option description.) [Matrix Single Choice] \*

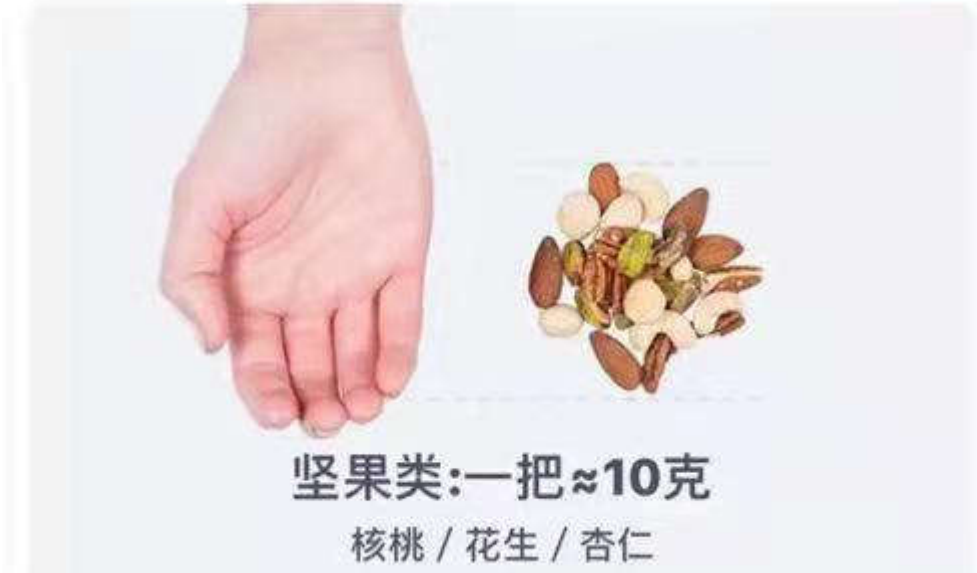

|  |            |            |           |            |         |           |           |            |          |
|--|------------|------------|-----------|------------|---------|-----------|-----------|------------|----------|
|  | Basic ally | 1 time per | 2-3 times | 1 time per | 2 times | 3-4 times | 5-6 times | 1 time per | ≥2 times |
|--|------------|------------|-----------|------------|---------|-----------|-----------|------------|----------|

|                      | don't<br>eat          | month                 | per<br>month          | week                  | a<br>week             | per<br>week           | per<br>week           | day                   | per<br>day            |
|----------------------|-----------------------|-----------------------|-----------------------|-----------------------|-----------------------|-----------------------|-----------------------|-----------------------|-----------------------|
| Walnuts              | <input type="radio"/> |
| Almonds<br>(raw)     | <input type="radio"/> |
| Almonds<br>(cooked)  | <input type="radio"/> |
| Chestnuts            | <input type="radio"/> |
| Cashew<br>nuts       | <input type="radio"/> |
| Lotus<br>seeds       | <input type="radio"/> |
| Batamax              | <input type="radio"/> |
| Pistachio            | <input type="radio"/> |
| Hazelnut             | <input type="radio"/> |
| Peanuts<br>(nuts)    | <input type="radio"/> |
| Sunflower<br>seeds   | <input type="radio"/> |
| Pumpkin<br>seeds     | <input type="radio"/> |
| Watermelo<br>n seeds | <input type="radio"/> |

17. How often do you eat the following fish, shrimp and crab? How many grams do you eat each time? (Please estimate based on the picture prompt and answer in grams in the option description.) [Matrix Single Choice] \*









|               |                       |                       |                       |                       |                       |                       |                       |                       |                       |
|---------------|-----------------------|-----------------------|-----------------------|-----------------------|-----------------------|-----------------------|-----------------------|-----------------------|-----------------------|
| Lamb          | <input type="radio"/> |
| Beef          | <input type="radio"/> |
| Chicken       | <input type="radio"/> |
| Roast Duck    | <input type="radio"/> |
| Roasted Squab | <input type="radio"/> |

20. How often do you eat the following dairy products and their products? How many **grams do you** eat each time? (Milk in 250ml for one cup, yogurt in 100g for one cup, condensed milk and cheese in teaspoon for 20g) [Matrix single-choice] \*

|                   | Basic<br>ally<br>don't<br>eat | 1 time<br>per<br>month | 2-3<br>times<br>per<br>month | 1 time<br>per<br>week | 2<br>times<br>a<br>week | 3-4<br>times<br>per<br>week | 5-6<br>times<br>per<br>week | 1 time<br>per<br>day  | ≥2<br>times<br>per<br>day |
|-------------------|-------------------------------|------------------------|------------------------------|-----------------------|-------------------------|-----------------------------|-----------------------------|-----------------------|---------------------------|
| Milk              | <input type="radio"/>         | <input type="radio"/>  | <input type="radio"/>        | <input type="radio"/> | <input type="radio"/>   | <input type="radio"/>       | <input type="radio"/>       | <input type="radio"/> | <input type="radio"/>     |
| Yogurt            | <input type="radio"/>         | <input type="radio"/>  | <input type="radio"/>        | <input type="radio"/> | <input type="radio"/>   | <input type="radio"/>       | <input type="radio"/>       | <input type="radio"/> | <input type="radio"/>     |
| Condensed<br>milk | <input type="radio"/>         | <input type="radio"/>  | <input type="radio"/>        | <input type="radio"/> | <input type="radio"/>   | <input type="radio"/>       | <input type="radio"/>       | <input type="radio"/> | <input type="radio"/>     |
| Cheese            | <input type="radio"/>         | <input type="radio"/>  | <input type="radio"/>        | <input type="radio"/> | <input type="radio"/>   | <input type="radio"/>       | <input type="radio"/>       | <input type="radio"/> | <input type="radio"/>     |

21. How often do you eat the following eggs? How **many** do you eat each time? [Matrix Multiple Choice] \*

|  | Basic<br>ally<br>don't<br>eat | 1 time<br>per<br>month | 2-3<br>times<br>per<br>month | 1 time<br>per<br>week | 2<br>times<br>a<br>week | 3-4<br>times<br>per<br>week | 5-6<br>times<br>per<br>week | 1 time<br>per<br>day | ≥2<br>times<br>per<br>day |
|--|-------------------------------|------------------------|------------------------------|-----------------------|-------------------------|-----------------------------|-----------------------------|----------------------|---------------------------|
|--|-------------------------------|------------------------|------------------------------|-----------------------|-------------------------|-----------------------------|-----------------------------|----------------------|---------------------------|





|                                                              |                       |                       |                       |                       |                       |                       |                       |                       |                       |
|--------------------------------------------------------------|-----------------------|-----------------------|-----------------------|-----------------------|-----------------------|-----------------------|-----------------------|-----------------------|-----------------------|
| Tablets                                                      |                       |                       |                       |                       |                       |                       |                       |                       |                       |
| C vitamin tablets                                            | <input type="radio"/> |
| D vitamin tablets                                            | <input type="radio"/> |
| Micronutrient supplements (45 questions to fill in the name) | <input type="radio"/> |
| Others:<br>_____<br>_____                                    | <input type="radio"/> |

\*Finish the question and skip to question 27.

27. names of other types of nutritional supplements [fill in the blank]\*

\_\_\_\_\_

28. Which two cooking methods do you eat most often? [Multiple choice] \*

- ☐ Frying
- ☐ Red Hot
- ☐ Frying
- ☐ Steamed
- ☐ pickled

☐ Cooking and stewing

☐ Baking

☐ Other: \_\_\_\_\_
