# Supplementary material for: Dietary Fiber Intake Influences Changes in Ankylosing Spondylitis Disease Status
Source: J Clin Med. 2023 Feb 17;12(4):1621. doi: 10.3390/jcm12041621 (PMC9960917; doi:10.3390/jcm12041621)
Supplement: Supplementary file 1 [file jcm-12-01621-s001.zip]

Archive with 5 entries (5 files):
- FFQ Questionnaire.pdf
- Supplementary Table1.pdf
- Supplementary Table2.pdf
- Supplementary Table3.pdf
- Supplementary Table4.pdf
